# Supplementary material
Source: Elsevier journal article supplement (https://www.sciencedirect.com/science/article/pii/S1134282X18300125)
Supplement: mmc1 [file S1134282X18300125:mmc1.docx]

**APÉNDICE 1. Indicadores de calidad en FANV**

**INDICADORES DE CONTEXTO**

Los indicadores de este primer bloque, denominado de contexto, permiten establecer comparaciones de los resultados en el resto de indicadores entre los centros en función del perfil de los pacientes atendidos.

| **DENOMINACIÓN DEL INDICADOR**: **Severidad atendida** | **CT01** |
| --- | --- |
| **DEFINICIÓN:** Las guías internacionales están de acuerdo en adoptar el CHA2DS2‐VASc como escala para medir el riesgo tromboembólico de los pacientes en FANV. Se ha determinado que el nivel de 2 o más sería aquel en el que los paciente están en riesgo alto. | |
| **FÓRMULA:** Número de pacientes con CHA2DS2‐VASc ≥2 con FANV/ Número total de pacientes con FANV X 100. | |
| **INDICADOR DE:** Contexto. | |
| **JUSTIFICACIÓN, EXCLUSIONES o ACLARACIONES:**  Es conocido que los pacientes con FANV y un CHA2DS2‐VASc de 2 o más es del 5% anual y esto disminuye con la administración de anticoagulantes orales.  Se entiende por FANV la FA en ausencia de prótesis valvular, estenosis mitral moderada grave y enfermedad valvular reumática. Se recomienda medir los casos anualmente. Se recomienda disponer de un programa que calcule directamente el CHA2DS2‐VASc.  Periodo de Cálculo: se recomiendan mediciones anuales. | |
| **FUENTE INFORMACIÓN:** Documentación clínica. | |
| **BIBLIOGRAFÍA**: (1,2) | |

CHA2DS2‐VASc: escala de riesgo tromboembólico; FANV: fibrilación auricular no valvular; FA: fibrilación auricular.

**INDICADORES DE SEGURIDAD**

Los siguientes indicadores corresponden al criterio de seguridad del paciente. Se trata de indicadores que reflejan el compromiso de las instituciones por ofrecer una atención llevando a cabo una correcta gestión de los riesgos inherentes a la prestación sanitaria y una adecuada utilización de los recursos diagnósticos y terapéuticos.

| **DENOMINACIÓN DEL INDICADOR**: **Cambio de tratamiento de AVK a ACOD en pacientes de alto riesgo de sangrado.** | **SP01** |
| --- | --- |
| **DEFINICIÓN:** El mejor perfil de seguridad de los nuevos anticoagulantes orales en cuanto al sangrado permite que estos pacientes con alto riesgo sean candidatos al cambio de tratamiento. | |
| **FÓRMULA:** Número de pacientes en tratamiento con AVK con una puntuación HAS‐BLED > 3 en quienes se ha cambiado tratamiento a ACOD / Número total de pacientes atendidos en el centro en el mismo período con una puntuación HAS‐BLED > 3 X 100 | |
| **INDICADOR DE:** Proceso. | |
| **JUSTIFICACIÓN, EXCLUSIONES o ACLARACIONES:**  Los ACOD tienen mejor perfil de seguridad en cuanto al sangrado.  Varios de los factores de riesgo embolico también son de riesgo hemorrágico, pero hay que diferenciar el contexto de ambos. Por ejemplo, en la HTA aunque esté controlado es factor riesgo embólico, sin embargo solo es factor hemorrágico cuando no lo está.  Periodo de Cálculo: se recomiendan mediciones anuales. | |
| **FUENTE INFORMACIÓN:** Documentación clínica. | |
| **NIVEL OBJETIVO O ACEPTABLE:** > 75% | |
| **BIBLIOGRAFÍA**: (2,3) | |

ACOD: anticoagulantes orales de acción directa**;** AVK: antagonistas de la vitamina K; HAS‐BLED > 3: escala de riesgo de sangrado; HTA: hipertensión arterial**.**

| **DENOMINACIÓN DEL INDICADOR**: **Disponibilidad de recursos diagnósticos.** | **SP02** |
| --- | --- |
| **DEFINICIÓN:** El inicio del tratamiento en pacientes con FANV es una medida de la eficacia en el proceso diagnóstico | |
| **FÓRMULA:** Número de pacientes con FANV atendidos en el centro en las primeras 48 horas tras primer diagnóstico con estudio completo de coagulación, creatinina, función hepática / Número total de pacientes con sospecha o diagnóstico de FANV atendidos al menos una vez en el centro en el mismo período de tiempo X 100. | |
| **INDICADOR DE:** Proceso. | |
| **JUSTIFICACIÓN, EXCLUSIONES o ACLARACIONES:**  En pacientes con FANV disminuye el riesgo cuanto antes iniciemos el tratamiento  Se entiende por estudio completo de coagulación la medición de la tasa de protrombina, el tiempo de tromboplastina activada y el tiempo de sangría.  Periodo de Cálculo: se recomiendan mediciones anuales. | |
| **FUENTE INFORMACIÓN:** Documentación clínica. | |
| **NIVEL OBJETIVO O ACEPTABLE:** > 90% | |
| **BIBLIOGRAFÍA**: (4) | |

FANV: fibrilación auricular no valvular**.**

| **DENOMINACIÓN DEL INDICADOR**: **Eventos tromboembólicos en tratamiento con TAO.** | **SP03** |
| --- | --- |
| **DEFINICIÓN:** El objetivo principal de la anticoagulación en la FANV es la prevención de las complicaciones tromboembólicas.  La calidad de la anticoagulación viene determinada por su reducción. | |
| **FÓRMULA:** Número de pacientes en tratamiento con TAO que sufren un episodio  tromboembólico / Número total de pacientes en tratamiento con TAO X 100. | |
| **INDICADOR DE:** Resultado. | |
| **JUSTIFICACIÓN, EXCLUSIONES o ACLARACIONES:**  Los nuevos anticoagulantes presentan un mayor beneficio absoluto en aquellos centros en los que no se consigue un buen grado de control con AVK. Se incluyen en la fórmula como episodios tromboembólicos: ACV o AIT, infarto de miocardio, embolismo pulmonar, embolismo periférico.  Periodo de Cálculo: se recomiendan mediciones anuales. | |
| **FUENTE INFORMACIÓN:** Documentación clínica. | |
| **NIVEL OBJETIVO O ACEPTABLE:** < 2,5% | |
| **BIBLIOGRAFÍA**: (5) | |

AVK: antagonistas de la vitamina K; ACV: accidente cerebrovascular; AIT: accidente isquémico transitorio; FANV: fibrilación auricular no valvular**;** TAO: tratamiento anticoagulante oral.

| **DENOMINACIÓN DEL INDICADOR**: **Eventos hemorrágicos en tratamiento con TAO.** | **SP04** |
| --- | --- |
| **DEFINICIÓN:** El principal evento adverso de la anticoagulación en la FANV es son las complicaciones hemorrágicas.  La calidad de la anticoagulación viene determinada por su reducción. | |
| **FÓRMULA:** Número de pacientes en tratamiento con TAO que sufren un accidente hemorrágico / Número total de pacientes en tratamiento con TAO X 100. | |
| **INDICADOR DE:** Resultado. | |
| **JUSTIFICACIÓN, EXCLUSIONES o ACLARACIONES:**  Los nuevos anticoagulantes presentan un mayor beneficio absoluto en aquellos centros en los que no se consigue un buen grado de control con AVK.  Se considera accidente hemorrágico (intracraneal o de cualquier otro tipo) siempre que el paciente requiere ingreso hospitalario o transfusión u otro tratamiento.  Periodo de Cálculo: se recomiendan mediciones anuales. | |
| **FUENTE INFORMACIÓN:** Documentación clínica. | |
| **NIVEL OBJETIVO O ACEPTABLE:** < 2,5% | |
| **BIBLIOGRAFÍA**: (5) | |

AVK: antagonistas de la vitamina K; FANV: fibrilación auricular no valvular; TAO: tratamiento anticoagulante oral**.**

| **DENOMINACIÓN DEL INDICADOR**: **Complicación tromboembólica tras cardioversión.** | **SP05** |
| --- | --- |
| **DEFINICIÓN:** Los pacientes intervenidos por cardioversión eléctrica deben seguir un control estricto del control de anticoagulación. | |
| **FÓRMULA:** Número de pacientes con complicación tromboembólica en los tres meses siguientes a la cardioversión/Número total de pacientes sometidos a cardioversión en el mismo periodo de tiempo x 100. | |
| **INDICADOR DE:** Resultado. | |
| **JUSTIFICACIÓN, EXCLUSIONES o ACLARACIONES:**  El periodo donde existe mayor tasa de complicaciones tromboembólicas es en los meses siguientes a una cardioversión. En este periodo es donde se debe ser más estricto en el control de la anticoagulación. Se recomienda no hacer cardioversión eléctrica en enfermos en FA con una duración superior a 48 horas si no están al menos cuatro semanas con nivel óptimo de coagulación o previo a realización de eco transesofágico. Este indicador reflejaría el grado de control de la anticoagulación previo a la cardioversión eléctrica, así como el despistaje de trombo intracavitarios previos al procedimiento.  Periodo de Cálculo: se recomiendan mediciones anuales. | |
| **FUENTE INFORMACIÓN:** Documentación clínica. | |
| **NIVEL OBJETIVO O ACEPTABLE:** < 1% | |
| **BIBLIOGRAFÍA**: (2,6,7) | |

FA: fibrilación auricular.

| **DENOMINACIÓN DEL INDICADOR**: **Recidiva de FA tras cardioversión.** | **SP06** |
| --- | --- |
| **DEFINICIÓN:** La recurrencia de FA en los pacientes a los tres meses siguientes a una cardioversión eléctrica es un indicador de tratamiento antiarrítmico inapropiado o cardioversiones inadecuadas. | |
| **FÓRMULA:** Número de pacientes en los que recidiva FANV en los tres meses siguientes a una cardioversión eléctrica / Número total de pacientes que han sido sometidos a cardioversión eléctrica en el mismo periodo de tiempo x 100 | |
| **INDICADOR DE:** Resultado. | |
| **JUSTIFICACIÓN, EXCLUSIONES o ACLARACIONES:**  Dado que no existe evidencia científica de que la estrategia de control de ritmo sea superior a la estrategia de control de frecuencia es necesario conocer el número de recidivas de FA en pacientes sometidos a cardioversiones en este periodo de tiempo  Es un indicador de cardioversiones inadecuadas o tratamiento antiarrítmico inapropiado.  Periodo de Cálculo: se recomiendan mediciones anuales. | |
| **FUENTE INFORMACIÓN:** Documentación clínica. | |
| **NIVEL OBJETIVO O ACEPTABLE:** < 30% | |
| **BIBLIOGRAFÍA**: (2,6,7) | |

FA: fibrilación auricular; FANV: fibrilación auricular no valvular**.**

**ACTIVACIÓN DEL PACIENTE**

La implicación del paciente en su autocuidado es un factor decisivo del éxito terapéutico y minimiza los riesgos asociados a los tratamientos con AVK o con ACOD. Por esta razón, una adecuada pauta terapéutica incluye la activación del paciente capacitándole para afrontar situaciones cotidianas y el empleo correcto de la medicación, incluyendo persistencia y adherencia al tratamiento. Los siguientes indicadores reflejan en qué medida se logran estos objetivos.

| **DENOMINACIÓN DEL INDICADOR**: **Estratificación del riesgo de los pacientes atendidos.** | **AC01** |
| --- | --- |
| **DEFINICIÓN:** Las guías de práctica clínica recomienda que todos los pacientes con FANV sean evaluados mediantes escalas de riesgo embolico y hemorrágico. Se recomienda el empleo dela escala CHA2DS2‐VASc y HAS BLED | |
| **FÓRMULA:** Número de pacientes con FA registrados en el centro con indicación de variables personales y clínicas relevantes y con estratificación del riesgo mediante escala (CHADS2, CHA2DS2‐VASc o HAS BLED) / Número total de pacientes con FA atendidos en el centro X 100. | |
| **INDICADOR DE**: Proceso. | |
| **JUSTIFICACIÓN, EXCLUSIONES o ACLARACIONES:**  Se admite que en algunos casos para disponer de toda la información completa para realizar las escalas de riesgo es necesario realizar más de una visita.  Periodo de Cálculo: se recomiendan mediciones anuales. | |
| **FUENTE INFORMACIÓN:** Documentación clínica. | |
| **NIVEL OBJETIVO O ACEPTABLE:** 95% | |
| **BIBLIOGRAFÍA**: (4,1,8) | |

FA: fibrilación auricular; FANV: fibrilación auricular no valvular; CHA2DS2‐VASc: escala de riesgo tromboembólico; HAS BLED: escala de riesgo de sangrado.

| **DENOMINACIÓN DEL INDICADOR: Anulación cardioversión con AVK.** | **AC02** |
| --- | --- |
| **DEFINICIÓN:** Pacientes tratados con AVK y con indicación de cardioversión que no pueden someterse a intervención por no encontrarse en rango de INR. | |
| **FÓRMULA:** Número de pacientes tratados con AVK en los que se anula cardioversión por no encontrarse en rango de INR en pacientes / Número total de pacientes tratados con AVK en los que tiene indicada cardioversión x 100. | |
| **INDICADOR DE:** Proceso. | |
| **JUSTIFICACIÓN, EXCLUSIONES o ACLARACIONES:**  Coeficiente entre el número de suspensiones de cardioversión y el volumen de pacientes fuera de rango INR de por incumplimiento terapéutico o por características del fármaco.  En el denominador de la fórmula se contabilizan pacientes con tratamiento de AVK e indicación de cardioversión, se produzca esta o no por encontrase en rango de INR. Deben excluirse otros motivos de anulación si los hubiera.  Periodo de Cálculo: se recomiendan mediciones anuales. | |
| **FUENTE INFORMACIÓN:** Documentación clínica. | |
| **NIVEL OBJETIVO O ACEPTABLE:** < 25% | |
| **BIBLIOGRAFÍA**: (9,10) | |

AVK: antagonistas de la vitamina K; INR: International Normalized Ratio**.**

| **DENOMINACIÓN DEL INDICADOR**: **Anulación de cardioversión en paciente tratados con ACOD.** | **AC03** |
| --- | --- |
| **DEFINICIÓN:** Pacientes tratados con ACOD y con indicación de cardioversión que no pueden someterse a intervención por no haber tenido adherencia al tratamiento. | |
| **FÓRMULA:** Número de pacientes tratados con ACOD en los que se anula cardioversión por incumplimiento terapéutico del paciente / Número total de pacientes tratados con ACOD en los que tiene indicada cardioversión x 100. | |
| **INDICADOR DE:** Proceso. | |
| **JUSTIFICACIÓN, EXCLUSIONES o ACLARACIONES:**  Coeficiente entre el número de suspensiones de cardioversión y el volumen de pacientes que hayan manifestado incumplimiento terapéutico.  En el denominador de la fórmula se contabilizan pacientes tratados con ACOD e indicación de cardioversión, se produzca esta o no por incumplimiento terapéutico del paciente. Deben excluirse otros motivos de anulación de la intervención si los hubiera.  Periodo de Cálculo: se recomiendan mediciones anuales. | |
| **FUENTE INFORMACIÓN:** Documentación clínica. | |
| **NIVEL OBJETIVO O ACEPTABLE:** < 5% | |
| **BIBLIOGRAFÍA**: (9,10) | |

ACOD: anticoagulantes de acción directa.

| **DENOMINACIÓN DEL INDICADOR**: **Educación sanitaria.** | **AC04** |
| --- | --- |
| **DEFINICIÓN:** Los pacientes en tratamiento anticoagulante deben recibir documentación con información sobre el tratamiento, su importancia para el control de la enfermedad, así como efectos secundarios u otro tipo de interacciones. | |
| **FÓRMULA:** Número de pacientes con FA en tratamiento con AVK o con ACOD a quienes se entrega documento con indicaciones terapéuticas y plan tratamiento / Número total de pacientes en tratamiento con AVK o con ACOD X 100. | |
| **INDICADOR DE:** Proceso. | |
| **JUSTIFICACIÓN, EXCLUSIONES o ACLARACIONES:**  Toda recomendación terapéutica con AVK debe de incluir las interacciones farmacológicas y alimenticias así como la recomendación de INR en la que se debe mantener.  Importancia de la adherencia en ambos casos.  Debe ser realizado por el especialista de referencia del paciente.  Periodo de Cálculo: se recomiendan mediciones anuales. | |
| **FUENTE INFORMACIÓN:** Documentación clínica. | |
| **NIVEL OBJETIVO O ACEPTABLE:** > 95% | |
| **BIBLIOGRAFÍA**: (4,5,11) | |

| **DENOMINACIÓN DEL INDICADOR**: **Persistencia al tratamiento.** | **AC05** |
| --- | --- |
| **DEFINICIÓN:** Pacientes que tienen adherencia continuada al tratamiento. | |
| **FÓRMULA:** Número de pacientes con FA persistentes en el tratamiento con AVK o con ACOD / Número total de pacientes con FA en tratamiento con AVK o con ACOD x 100. | |
| **INDICADOR DE:** Proceso. | |
| **JUSTIFICACIÓN, EXCLUSIONES o ACLARACIONES:**  Consideramos no persistente aquel que abandona el tratamiento por un periodo mayor de 30 días.  Periodo de Cálculo: se recomiendan mediciones anuales. | |
| **FUENTE INFORMACIÓN:** Documentación clínica. | |
| **NIVEL OBJETIVO O ACEPTABLE:** > 90% | |
| **BIBLIOGRAFÍA**: (5,12) | |

ACOD: anticoagulantes de acción directa; AVK: antagonistas de la vitamina K; FA: fibrilación auricular.

**RESULTADOS DE LA INTERVENCIÓN EN EL PACIENTE**

Este conjunto de indicadores de resultado reflejan la efectividad y eficiencia terapéuticas y permiten realizar comparaciones entre centros dentro del sistema de benchmarking definido.

| **DENOMINACIÓN DEL INDICADOR**: **Adecuación del tratamiento con AVK o con ACOD.** | **RS01** |
| --- | --- |
| **DEFINICIÓN:** Los pacientes con riesgo tromboembólico deben recibir tratamiento  Anticoagulante. | |
| **FÓRMULA:** Número de pacientes con indicación de anticoagulación que están siendo tratados con AVK o con ACOD / Número total de pacientes diagnosticados de FANV X 100. | |
| **INDICADOR DE:** Proceso. | |
| **JUSTIFICACIÓN, EXCLUSIONES o ACLARACIONES:**  Las guías de prácticas clínica recomiendan anticoagulación en pacientes con FANV y con CHA2DS2‐VASc ≥ 1. Se excluyen mujeres < 65 años sin otros factores de riesgo tromboembólico asociados.  Periodo de Cálculo: se recomiendan mediciones anuales. | |
| **FUENTE INFORMACIÓN:** Documentación clínica. | |
| **NIVEL OBJETIVO O ACEPTABLE:** 95% | |
| **BIBLIOGRAFÍA**: (2) | |

ACOD: anticoagulantes de acción directa. AVK: antagonistas de la vitamina K; CHA2DS2‐VASc ≥ 1: escala de riesgo tromboembólico; FANV: fibrilación auricular no valvular.

| **DENOMINACIÓN DEL INDICADOR**: **Capacidad de respuesta para iniciar tratamiento.** | **RS02** |
| --- | --- |
| **DEFINICIÓN:** El tiempo transcurrido desde que se tiene un primer contacto con el pacientes hasta que se inicia el tratamiento con anticoagulantes. | |
| **FÓRMULA:** Número de pacientes con FANV que inician tratamiento antes de las 72 horas desde el primer contacto/ Número total de pacientes con FANV en tratamiento con anticoagulantes X 100. | |
| **INDICADOR DE:** Resultado. | |
| **JUSTIFICACIÓN, EXCLUSIONES o ACLARACIONES:**  La fórmula indica el tiempo en horas trascurrido desde que tiene lugar el primer contacto con ese paciente hasta que se inicia el tratamiento con anticoagulantes.  El tiempo máximo recomendado es de 72 horas.  Periodo de Cálculo: se recomiendan mediciones anuales. | |
| **FUENTE INFORMACIÓN:** Documentación clínica. | |
| **NIVEL OBJETIVO O ACEPTABLE:** >95% | |
| **BIBLIOGRAFÍA**: (2,4,7) | |

FANV: fibrilación auricular no valvular.

| **DENOMINACIÓN DEL INDICADOR**: **Capacidad de respuesta para cardioversión.** | **RS03** |
| --- | --- |
| **DEFINICIÓN:** El tiempo transcurrido desde que se realiza la indicación para cardioversión hasta que se produces la intervención. | |
| **FÓRMULA:** Número de pacientes a los que se le realiza cardioversión antes de 45 días desde su indicación / Número total de pacientes con indicación de cardioversión X 100. | |
| **INDICADOR DE:** Resultado. | |
| **JUSTIFICACIÓN, EXCLUSIONES o ACLARACIONES:**  La fórmula indica el tiempo en días trascurrido desde que tiene lugar la indicación de cardioversión con ese paciente hasta que se realiza la intervención.  El tiempo máximo recomendado es de 45 días.  El porcentaje de éxito de cardioversión es menor cuanto más tiempo transcurra  Periodo de Cálculo: se recomiendan mediciones anuales | |
| **FUENTE INFORMACIÓN:** Documentación clínica. | |
| **NIVEL OBJETIVO O ACEPTABLE:** >90% | |
| **BIBLIOGRAFÍA**: (2,4,7) | |

| **DENOMINACIÓN DEL INDICADOR**: **Nivel de control de pacientes con AVK** | **RS04** |
| --- | --- |
| **DEFINICIÓN:** Porcentaje de permanencia del INR en rango terapéutico en pacientes en tratamiento con AVK | |
| **FÓRMULA:** Número de pacientes en tratamiento con AVK con permanencia en rango terapéutico (INR) / Número de pacientes en tratamiento con AVK X 100 | |
| **INDICADOR DE:** Resultado. | |
| JUSTIFICACIÓN, EXCLUSIONES o ACLARACIONES:  Según Rosendaal se considera permanencia en rango aquel paciente cuyas determinaciones presentan un INR en niveles adecuados el 65% o más del tiempo de tratamiento.  Periodo de Cálculo: se recomiendan mediciones cuatrimestrales. | |
| **FUENTE INFORMACIÓN:** Documentación clínica. | |
| **NIVEL OBJETIVO O ACEPTABLE:** ≥75% | |
| **BIBLIOGRAFÍA**: (5,10,13) | |

AVK: antagonistas de la vitamina K; INR: International Normalized Ratio**.**

| **DENOMINACIÓN DEL INDICADOR**: **Satisfacción del paciente** | **RS05** |
| --- | --- |
| **DEFINICIÓN:** Satisfacción con respecto a la atención recibida del paciente en tratamiento con ACOD | |
| **FÓRMULA:** Número de pacientes satisfechos con la atención y resultado del tratamiento (cardioversión, tratamiento con fármacos AVK o ACOD) recibido / Número total de pacientes en tratamiento x 100 | |
| **INDICADOR DE:** Resultado. | |
| **JUSTIFICACIÓN, EXCLUSIONES o ACLARACIONES:**  Se considera paciente satisfecho si la Encuesta de satisfacción SAFUCA tiene un resultado positivo  Periodo de Cálculo: se recomiendan mediciones anuales | |
| **FUENTE INFORMACIÓN:** Documentación clínica. | |
| **NIVEL OBJETIVO O ACEPTABLE:** ≥70% | |
| **BIBLIOGRAFÍA**: (5,14) | |

ACOD: anticoagulantes de acción directa. AVK: antagonistas de la vitamina K.
