# Supplementary material
Source: Elsevier journal article supplement (https://www.sciencedirect.com/science/article/pii/S1134282X18300125)
Supplement: mmc2 [file S1134282X18300125:mmc2.docx]

**ANEXO B. Indicadores de calidad en ETEV**

**INDICADOR DE CONTEXTO**

Los indicadores de este primer bloque, denominado de contexto, permiten establecer comparaciones de los resultados en el resto de indicadores entre los centros en función del perfil de los pacientes atendidos.

| **DENOMINACIÓN DEL INDICADOR**: **Incidencia paciente atendido en el centro.** | **CT01** |
| --- | --- |
| **DEFINICIÓN:** Índice de sospecha. | |
| **FÓRMULA:** Número de pacientes con diagnóstico confirmado de ETEV atendidos en el centro / Número total de pacientes con sospecha y/o diagnóstico de ETEV atendidos al menos una vez en el centro X 100. | |
| **INDICADOR DE:** Contexto. | |
| **JUSTIFICACIÓN, EXCLUSIONES o ACLARACIONES:**  El índice de sospecha no es igual en función de la patología del paciente.  Se espera una mayor incidencia en centros que atiendan un mayor porcentaje de pacientes oncológicos.  Periodo de Cálculo: se recomiendan mediciones anuales. | |
| **FUENTE INFORMACIÓN:** Documentación clínica. | |
| **BIBLIOGRAFÍA**: (1,2) | |

ETEV: enfermedad tromboembólica venosa

| **DENOMINACIÓN DEL INDICADOR**: **Pacientes en tratamiento con ACOD.** | **CT02** |
| --- | --- |
| **DEFINICIÓN:** Perfil de utilización de productos innovadores en la ETEV. | |
| **FÓRMULA:** Número de pacientes con ETEV en tratamiento con ACOD/ Número total de pacientes con ETEV tratados farmacológicamente en el centro X 100. | |
| **INDICADOR DE:** Contexto. | |
| **JUSTIFICACIÓN, EXCLUSIONES o ACLARACIONES:**  El perfil de seguridad así como la comodidad de los ACOD hacen que su uso debiera ser preferente.  Periodo de Cálculo: se recomiendan mediciones anuales. | |
| **FUENTE INFORMACIÓN:** Documentación clínica. | |
| **BIBLIOGRAFÍA**: (1,3,4) | |

ACOD: anticoagulantes orales de acción directa; ETEV: enfermedad tromboembólica venosa.

**SEGURIDAD DEL PACIENTE**

Los siguientes indicadores corresponden al criterio de seguridad del paciente. Se trata de indicadores que reflejan el compromiso de las instituciones por ofrecer una atención llevando a cabo una correcta gestión de los riesgos inherentes a la prestación sanitaria y una adecuada utilización de los recursos

diagnósticos y terapéuticos.

| **DENOMINACIÓN DEL INDICADOR**: **Eventos tromboembólicos en tratamiento con AVK.** | **SP01** |
| --- | --- |
| **DEFINICIÓN:** El objetivo principal de la anticoagulación en la ETEV es la prevención de la aparición de nuevas complicaciones tromboembólicas, así como la progresión de trombosis venosa de extremidades a embolia pulmonar. | |
| **FÓRMULA:** Número de pacientes en tratamiento con AVK que sufren un episodio  tromboembólico / Número total de pacientes en tratamiento con AVK X 100. | |
| **INDICADOR DE:** Resultado. | |
| **JUSTIFICACIÓN, EXCLUSIONES o ACLARACIONES:**  Se incluyen en la fórmula como episodios tromboembólicos: Tromboembolismo  pulmonar o tromboembolismo venoso de extremidades Periodo de Cálculo: se recomiendan mediciones anuales. | |
| **NIVEL OBJETIVO O ACEPTABLE:** < 2.5%. | |
| **FUENTE INFORMACIÓN:** Documentación clínica. | |
| **BIBLIOGRAFÍA**: (3,5) | |

AVK: antagonistas de la vitamina K; ETEV: enfermedad tromboembólica venosa.

| **DENOMINACIÓN DEL INDICADOR**: **Eventos tromboembólicos en tratamiento con ACOD.** | **SP02** |
| --- | --- |
| **DEFINICIÓN:** El objetivo principal de la anticoagulación en la ETEV es la prevención de la aparición de nuevas complicaciones tromboembólicas, así como la progresión de trombosis venosa de extremidades a embolia pulmonar. | |
| **FÓRMULA:** Número de pacientes en tratamiento con ACOD que sufren un episodio tromboembólico / Número total de pacientes en tratamiento con ACOD X 100. | |
| **INDICADOR DE:** Resultado. | |
| **JUSTIFICACIÓN, EXCLUSIONES o ACLARACIONES:**  Se incluyen en la fórmula como episodios tromboembólicos: tromboembolismo  pulmonar o tromboembolismo venoso de extremidades.  Periodo de Cálculo: se recomiendan mediciones anuales. | |
| **NIVEL OBJETIVO O ACEPTABLE:** < 2.5%. | |
| **FUENTE INFORMACIÓN:** Documentación clínica. | |
| **BIBLIOGRAFÍA**: (3,5) | |

ACOD: anticoagulantes orales de acción directa; ETEV: enfermedad tromboembólica venosa.

| **DENOMINACIÓN DEL INDICADOR**: **Eventos tromboembólicos en tratamiento con HBPM.** | **SP03** |
| --- | --- |
| **DEFINICIÓN:** El objetivo principal de la anticoagulación en la ETEV es la prevención de la aparición de nuevas complicaciones tromboembólicas, así como la progresión de trombosis venosa de extremidades a embolia pulmonar. | |
| **FÓRMULA:** Número de pacientes en tratamiento con HBPM que sufren un episodio tromboembólico / Número total de pacientes en tratamiento con HBPM X 100. | |
| **INDICADOR DE:** Resultado. | |
| **JUSTIFICACIÓN, EXCLUSIONES o ACLARACIONES:**  Se incluyen en la fórmula como episodios tromboembólicos: tromboembolismo  pulmonar o tromboembolismo venoso de extremidades.  Periodo de Cálculo: se recomiendan mediciones anuales. | |
| **NIVEL OBJETIVO O ACEPTABLE:** < 2.5% | |
| **FUENTE INFORMACIÓN:** Documentación clínica. | |
| **BIBLIOGRAFÍA**: (3,5) | |

HBPM: heparina de bajo peso molecular; ETEV: enfermedad tromboembólica venosa.

| **DENOMINACIÓN DEL INDICADOR**: **Eventos hemorrágicos en tratamiento con AVK.** | **SP04** |
| --- | --- |
| **DEFINICIÓN:** El uso de anticoagulantes conlleva riesgo de eventos hemorrágicos graves. | |
| **FÓRMULA:** Número de pacientes en tratamiento con AVK que sufren hemorragia/ Número total de pacientes en tratamiento con AVK X 100. | |
| **INDICADOR DE:** Resultado. | |
| **JUSTIFICACIÓN, EXCLUSIONES o ACLARACIONES:**  Se considera accidente hemorrágico grave en pacientes no quirúrgicos la hemorragia mortal y / o hemorragia sintomática en un área u órgano crítico, como intracraneal, intraespinal, intraocular, retroperitoneal, intraarticular o pericárdico, o intramuscular con síndrome compartimental y / o el sangrado que provoca una caída en el nivel de hemoglobina de 2 g / dl (1,24 mmol / L) o más, o que conduce a la transfusión de dos o más unidades de sangre total o glóbulos rojos.  Periodo de Cálculo: se recomiendan mediciones anuales. | |
| **NIVEL OBJETIVO O ACEPTABLE:** < 3.5% | |
| **FUENTE INFORMACIÓN:** Documentación clínica. | |
| **BIBLIOGRAFÍA**: (3,5,6) | |

AVK: antagonistas de la vitamina K.

| **DENOMINACIÓN DEL INDICADOR**: **Eventos hemorrágicos en tratamiento con ACOD.** | **SP05** |
| --- | --- |
| **DEFINICIÓN:** El uso de anticoagulantes conlleva riesgo de eventos hemorrágicos graves. | |
| **FÓRMULA:** Número de pacientes en tratamiento con ACOD que sufren hemorragia/ Número total de pacientes en tratamiento con ACOD X 100. | |
| **INDICADOR DE:** Resultado. | |
| **JUSTIFICACIÓN, EXCLUSIONES o ACLARACIONES:**  Se considera accidente hemorrágico grave en pacientes no quirúrgicos la hemorragia mortal y / o hemorragia sintomática en un área u órgano crítico, como intracraneal, intraespinal, intraocular, retroperitoneal, intraarticular o pericárdico, o intramuscular con síndrome compartimental y / o el sangrado que provoca una caída en el nivel de hemoglobina de 2 g / dl (1,24 mmol / L) o más, o que conduce a la transfusión de dos o más unidades de sangre total o glóbulos rojos.  Periodo de Cálculo: se recomiendan mediciones anuales. | |
| **NIVEL OBJETIVO O ACEPTABLE:** < 3.5% | |
| **FUENTE INFORMACIÓN:** Documentación clínica. | |
| **BIBLIOGRAFÍA**: (3,5,6) | |

ACOD: anticoagulantes orales de acción directa.

| **DENOMINACIÓN DEL INDICADOR**: **Eventos hemorrágicos en tratamiento con HBPM.** | **SP06** |
| --- | --- |
| **DEFINICIÓN:** El uso de anticoagulantes conlleva riesgo de eventos hemorrágicos graves. | |
| FÓRMULA: Número de pacientes en tratamiento con HBPM que sufren hemorragia/ Número total de pacientes en tratamiento con HBPM X 100. | |
| INDICADOR DE: Resultado. | |
| JUSTIFICACIÓN, EXCLUSIONES o ACLARACIONES:  Se considera accidente hemorrágico grave en pacientes no quirúrgicos la hemorragia mortal y / o hemorragia sintomática en un área u órgano crítico, como intracraneal, intraespinal, intraocular, retroperitoneal, intraarticular o pericárdico, o intramuscular con síndrome compartimental y / o el sangrado que provoca una caída en el nivel de hemoglobina de 2 g / dl (1,24 mmol / L) o más, o que conduce a la transfusión de dos o más unidades de sangre total o glóbulos rojos.  Periodo de Cálculo: se recomiendan mediciones anuales. | |
| **NIVEL OBJETIVO O ACEPTABLE:** < 30% | |
| **FUENTE INFORMACIÓN:** Documentación clínica. | |
| **BIBLIOGRAFÍA**: (3,5,6) | |

HBPM: heparina de bajo peso molecular.

| **DENOMINACIÓN DEL INDICADOR**: **Sospecha diagnóstica.** | **SP07** |
| --- | --- |
| **DEFINICIÓN:** Sospecha de pacientes con ETEV en el Centro | |
| **FÓRMULA:** Número de pacientes con sospecha ETEV que acuden al centro con nivel sospecha establecida mediante escala Wells o Ginebra / Número total de pacientes con sospecha y/o diagnóstico de ETEV que acuden al centro X 100. | |
| **INDICADOR DE:** Resultado. | |
| **JUSTIFICACIÓN, EXCLUSIONES o ACLARACIONES:**  El índice de sospecha varía en función del tipo de paciente. Las escalas de Wells y Ginebra ayudan a predeterminar la posibilidad de que se confirme el diagnóstico de trombosis.  Periodo de Cálculo: se recomiendan mediciones anuales. | |
| **NIVEL OBJETIVO O ACEPTABLE:** > 80% | |
| **FUENTE INFORMACIÓN:** Documentación clínica. | |
| **BIBLIOGRAFÍA**: (1) | |

ETEV: enfermedad tromboembólica venosa.

| **DENOMINACIÓN DEL INDICADOR**: **Reingresos.** | **SP08** |
| --- | --- |
| **DEFINICIÓN:** Tromboembolismos secundarios a hospitalización. | |
| **FÓRMULA:** Número de pacientes tratados por otro motivo con ETEV post‐ingreso  hospitalario en las cuatro semanas posteriores al alta / Número total de pacientes con ETEV x 100. | |
| **INDICADOR DE:** Resultado. | |
| **JUSTIFICACIÓN, EXCLUSIONES o ACLARACIONES:**  En función del tipo de patología el riesgo de trombosis tras intervención quirúrgica o procesos médicos es alto. Una adecuada política de prevención de trombosis es necesaria en las distintas especialidades.  En el caso de que los reingresos superen el nivel objetivo establecido, se recomienda un seguimiento para comprobar si son pacientes que procedían de tratamiento médico o quirúrgico, y en su caso, comprobar si el paciente había recibido indicación de profilaxis.  Periodo de Cálculo: se recomiendan mediciones anuales. | |
| **NIVEL OBJETIVO O ACEPTABLE:** < 30% | |
| **FUENTE INFORMACIÓN:** Documentación clínica. | |
| **BIBLIOGRAFÍA**: (7–9) | |

ETEV: enfermedad tromboembólica venosa.

| **DENOMINACIÓN DEL INDICADOR**: **Adecuación terapéutica.** | **SP09** |
| --- | --- |
| **DEFINICIÓN:** Selección de fármaco y dosis adecuada al fenotipo del paciente. | |
| **FÓRMULA:** Número de pacientes en tratamiento con ACOD con correcta dosificación considerando edad, peso, tratamiento coadyuvante, función renal (creatinina) / Número de pacientes en tratamiento con ACOD X 100. | |
| **INDICADOR DE:** Resultado. | |
| **JUSTIFICACIÓN, EXCLUSIONES o ACLARACIONES:**  Lo ideal sería realizar este parámetro para las distintas opciones terapéuticas, pero en la práctica clínica habitual no se dispone del test de Rosendaal (TTR) y respecto a la HBPM pocas veces se especifica el peso del paciente en el informe.  Periodo de Cálculo: se recomiendan mediciones anuales. | |
| **NIVEL OBJETIVO O ACEPTABLE:** > 95% | |
| **FUENTE INFORMACIÓN:** Documentación clínica. | |
| **BIBLIOGRAFÍA**: (1,2,10) | |

ACOD: anticoagulantes orales de acción directa; HBPM: heparina de bajo peso molecular.

| **DENOMINACIÓN DEL INDICADOR**: **Mortalidad.** | **SP10** |
| --- | --- |
| **DEFINICIÓN:** Mortalidad por recurrencia de ETEV. | |
| **FÓRMULA:** Número de pacientes que fallecen en el primer mes tras diagnóstico de ETEV atribuida a enfermedad tromboembólica / Número total de pacientes con diagnóstico de ETEV X 100. | |
| **INDICADOR DE:** Resultado. | |
| **JUSTIFICACIÓN, EXCLUSIONES o ACLARACIONES:**  Se considera la tasa en los primeros tres meses tras el diagnóstico.  Del objetivo aceptable se excluye la mortalidad en las primeras 48 horas y la mortalidad por hemorragia.  Periodo de Cálculo: se recomiendan mediciones anuales. | |
| **NIVEL OBJETIVO O ACEPTABLE:** < 1% | |
| **FUENTE INFORMACIÓN:** Documentación clínica. | |
| **BIBLIOGRAFÍA**: (4) | |

ETEV: enfermedad tromboembólica venosa.

| **DENOMINACIÓN DEL INDICADOR**: **Mortalidad.** | **SP11** |
| --- | --- |
| **DEFINICIÓN:** Mortalidad por hemorragia tras el diagnóstico de ETEV. | |
| **FÓRMULA:** Número de pacientes que fallecen en el primer mes tras diagnóstico de ETEV atribuida a hemorragia / Número total de pacientes con diagnóstico de ETEV X 100. | |
| **INDICADOR DE:** Resultado. | |
| **JUSTIFICACIÓN, EXCLUSIONES o ACLARACIONES:**  Se considera la tasa en los primeros tres meses tras el diagnóstico.  Periodo de Cálculo: se recomiendan mediciones anuales. | |
| **NIVEL OBJETIVO O ACEPTABLE:** < 1% | |
| **FUENTE INFORMACIÓN:** Documentación clínica. | |
| **BIBLIOGRAFÍA**: (4) | |

ETEV: enfermedad tromboembólica venosa.

**ACTIVACIÓN DEL PACIENTE**

La implicación del paciente en su autocuidado es un factor decisivo del éxito terapéutico y minimiza los riesgos asociados a los tratamientos. Por esta razón, una adecuada pauta terapéutica incluye la activación del paciente capacitándole para afrontar situaciones cotidianas y el empleo correcto de la medicación, incluyendo persistencia y adherencia al tratamiento. Los siguientes indicadores reflejan en qué medida se logran estos objetivos.

| **DENOMINACIÓN DEL INDICADOR**: **Estratificación del riesgo hemorrágico de los pacientes atendidos.** | **AC01** |
| --- | --- |
| **DEFINICIÓN:** Las guías de práctica clínica recomiendan valorar el riesgo hemorrágico en los pacientes anticoagulados. | |
| **FÓRMULA:** Número de pacientes con ETEV registrados en el centro con estratificación del riesgo hemorrágico mediante escala / Número total de pacientes con ETEV atendidos en el centro X 100. | |
| **INDICADOR DE:** Proceso | |
| **JUSTIFICACIÓN, EXCLUSIONES o ACLARACIONES:**  Se admite que en algunos casos para disponer de toda la información completa para realizar las escalas de riesgo es necesario realizar más de una visita.  Aunque no hay ninguna escala totalmente validad, se recomienda el empleo de alguna de ellas en particular RIETE.  Periodo de Cálculo: se recomiendan mediciones anuales. | |
| **NIVEL OBJETIVO O ACEPTABLE:** > 60% | |
| **FUENTE INFORMACIÓN:** Documentación clínica. | |
| **BIBLIOGRAFÍA**: (11–14) | |

ETEV: enfermedad tromboembólica venosa.

| **DENOMINACIÓN DEL INDICADOR**: **Adecuación del Informe de Alta.** | **AC02** |
| --- | --- |
| **DEFINICIÓN:** Interpretar si el episodio trombótico ha sido secundario a alguna causa o no, conlleva diferente duración del tratamiento anticoagulante, por lo que es imprescindible tratar de identificar y registrar el factor causal (inmovilización, trombofilia previa, cirugía previa, neoplasia, viajes prolongados, anticonceptivos orales u otros tratamiento hormonales y embarazo). | |
| **FÓRMULA:** Número de pacientes con diagnóstico de ETEV en tratamiento en el centro en quienes se ha registrado como idiopática o secundaria en el informe de alta / Número total de pacientes con ETEV atendidos en el centro X 100. | |
| **INDICADOR DE:** Proceso | |
| **JUSTIFICACIÓN, EXCLUSIONES o ACLARACIONES:**  Determinar si ha habido algún factor causal ayuda a determinar el tiempo de tratamiento de ese paciente.  Periodo de Cálculo: se recomiendan mediciones anuales. | |
| **NIVEL OBJETIVO O ACEPTABLE:** ≥ 97% | |
| **FUENTE INFORMACIÓN:** Documentación clínica. | |
| **BIBLIOGRAFÍA**: (15) | |

ETEV: enfermedad tromboembólica venosa.

| **DENOMINACIÓN DEL INDICADOR**: **Indicador de Seguimiento.** | **AC03** |
| --- | --- |
| **DEFINICIÓN:** El seguimiento de los pacientes con ETEV se recomienda por la tasa de complicaciones tanto hemorrágicas como recurrencias tromboembólicas. | |
| **FÓRMULA:** Número de pacientes con ETEV a los que se les indica un seguimiento específico / Número total de pacientes con ETEV atendidos en el centro X 100. | |
| **INDICADOR DE:** Proceso | |
| **JUSTIFICACIÓN, EXCLUSIONES o ACLARACIONES:**  Dado que la duración del tratamiento no es indefinida en muchos pacientes se recomienda un seguimiento en una unidad específica para decidir duración y valorar posibles complicaciones.  Periodo de Cálculo: se recomiendan mediciones anuales. | |
| **NIVEL OBJETIVO O ACEPTABLE:** ≥ 95% | |
| **FUENTE INFORMACIÓN:** Documentación clínica. | |
| **BIBLIOGRAFÍA**: (10,15) | |

ETEV: enfermedad tromboembólica venosa.

| **DENOMINACIÓN DEL INDICADOR**: **Confirmación diagnóstica.** | **RS01** |
| --- | --- |
| **DEFINICIÓN:** El tiempo entre que el paciente consulta y la obtención de una prueba objetiva que confirme el diagnóstico. | |
| **FÓRMULA:** Número de pacientes diagnosticados de ETEV / Número total de pacientes con sospecha de ETEV establecida mediante escala Wells o Ginebra x 100 | |
| **INDICADOR DE:** Resultado | |
| **JUSTIFICACIÓN, EXCLUSIONES o ACLARACIONES:**  El índice de sospecha varía en función del tipo de paciente. Las escalas de Wells y Ginebra ayudan a predeterminar la posibilidad de que se confirme el diagnóstico de trombosis.  Periodo de Cálculo: se recomiendan mediciones anuales. | |
| **NIVEL OBJETIVO O ACEPTABLE:** ≥ 85% | |
| **FUENTE INFORMACIÓN:** Documentación clínica. | |
| **BIBLIOGRAFÍA**: (1,16,17) | |

ETEV: enfermedad tromboembólica venosa.

| **DENOMINACIÓN DEL INDICADOR**: **Capacidad de respuesta diagnóstica.** | **RS02** |
| --- | --- |
| **DEFINICIÓN:** El tiempo entre que el paciente consulta y la obtención de una prueba objetiva que confirme el diagnóstico. | |
| **FÓRMULA:** Número de pacientes diagnosticados de ETEV en menos de 48 horas / Número total de pacientes diagnosticados de ETEV x 100 | |
| **INDICADOR DE:** Resultado | |
| **JUSTIFICACIÓN, EXCLUSIONES o ACLARACIONES:**  Como punto inicial se considera el primer contacto del paciente con cualquier profesional sanitario en el centro. La fórmula indica el tiempo en horas trascurrido desde que tiene lugar el primer contacto con ese paciente hasta que es realizado el diagnóstico de ETEV.  Periodo de Cálculo: se recomiendan mediciones anuales. | |
| **NIVEL OBJETIVO O ACEPTABLE:** ≥ 90% | |
| **FUENTE INFORMACIÓN:** Documentación clínica. | |
| **BIBLIOGRAFÍA**: (16,17) | |

ETEV: enfermedad tromboembólica venosa.

| **DENOMINACIÓN DEL INDICADOR**: **Efectividad terapéutica. Nivel de control de pacientes con AVK.** | **RS03** |
| --- | --- |
| **DEFINICIÓN:** Porcentaje de permanencia del INR en rango terapéutico en pacientes en tratamiento con AVK. | |
| **FÓRMULA:** Número de pacientes en tratamiento con AVK con permanencia en rango terapéutico (INR) / Número de pacientes en tratamiento con AVK X 100. | |
| **INDICADOR DE:** Resultado. | |
| **JUSTIFICACIÓN, EXCLUSIONES o ACLARACIONES:**  Se considera paciente satisfecho cuando todos los ítems de Cuestionario de Satisfacción del Paciente con ETEV están valorados como bien o muy bien.  Periodo de Cálculo: se recomiendan mediciones anuales. | |
| **NIVEL OBJETIVO O ACEPTABLE:** ≥ 70% | |
| **FUENTE INFORMACIÓN:** Encuesta de opinión. | |
| **BIBLIOGRAFÍA**: (5,18–20) | |

AVK: antagonistas de la vitamina K; INR: International Normalized Ratio.

| **DENOMINACIÓN DEL INDICADOR**: **Satisfacción del paciente.** | **RS04** |
| --- | --- |
| **DEFINICIÓN:** Satisfacción con respecto a la atención recibida del paciente con ETEV. | |
| **FÓRMULA:** Número de pacientes satisfechos con la atención recibida/ Número total de pacientes x 100. | |
| **INDICADOR DE:** Resultado | |
| **JUSTIFICACIÓN, EXCLUSIONES o ACLARACIONES:**  Se considera paciente satisfecho cuando todos los ítems de Cuestionario de Satisfacción del Paciente con ETEV están valorados como bien o muy bien.  Periodo de Cálculo: se recomiendan mediciones anuales. | |
| **NIVEL OBJETIVO O ACEPTABLE:** ≥ 70% | |
| **FUENTE INFORMACIÓN:** Encuesta de opinión. | |
| **BIBLIOGRAFÍA**: (5) | |

ETEV: enfermedad tromboembólica venosa.

**BIBLIOGRAFÍA**

1. Uresandi F, Monreal M, García-Bragado F, Domenech P, Lecumberri R, Escribano P, et al. Consenso nacional sobre el diagnóstico, estratificación de riesgo y tratamiento de los pacientes con tromboembolia pulmonar. Arch Bronconeumol [Internet]. 2013 Dec;49(12):534–47. Available from: http://linkinghub.elsevier.com/retrieve/pii/S0300289613002263

2. Konstantinides S, Torbicki A, Agnelli G, Danchin N, Fitzmaurice D, Galiè N, et al. 2014 ESC Guidelines on the diagnosis and management of acute pulmonary embolism. Eur Heart J [Internet]. 2014 Nov 14;35(43):3033–73. Available from: http://eurheartj.oxfordjournals.org/lookup/doi/10.1093/eurheartj/ehu283

3. Castellucci LA, Cameron C, Le Gal G, Rodger MA, Coyle D, Wells PS, et al. Clinical and Safety Outcomes Associated With Treatment of Acute Venous Thromboembolism. JAMA [Internet]. 2014 Sep 17;312(11):1122. Available from: http://jama.jamanetwork.com/article.aspx?doi=10.1001/jama.2014.10538

4. Tagalakis V, Patenaude V, Kahn SR, Suissa S. Treatment patterns of venous thromboembolism in a real-world population: The Q-VTE study cohort. Thromb Res [Internet]. 2014 Oct;134(4):795–802. Available from: http://linkinghub.elsevier.com/retrieve/pii/S0049384814003624

5. Sociedad Andaluza de Calidad Asistencial (SADECA) Sociedad Española de Trombosis y hemostasia (SETH). Indicadores de calidad y seguridad para la atención a pacientes con tratamiento anticoagulante oral [Internet]. 2012 [cited 2016 Aug 16]. Available from: http://www.sadeca.es/opencms75/export/sites/sadeca/galerias/descargas/Indicadores_de_calidad_y_seguridad_TAO.pdf

6. SCHULMAN S, KEARON C. Definition of major bleeding in clinical investigations of antihemostatic medicinal products in non-surgical patients. J Thromb Haemost [Internet]. 2005 Apr 4;3(4):692–4. Available from: http://doi.wiley.com/10.1111/j.1538-7836.2005.01204.x

7. Cunningham R, Murray A, S. Byrne J, Hammond L, Barry M, Mehigan D, et al. Venous thromboembolism prophylaxis guideline compliance: a pilot study of augmented medication charts. Irish J Med Sci (1971 -) [Internet]. 2015 Jun 15;184(2):469–74. Available from: http://link.springer.com/10.1007/s11845-014-1148-6

8. Nicolaides AN, Fareed J, Kakkar AK, Comerota AJ, Goldhaber SZ, Hull R, et al. Prevention and treatment of venous thromboembolism--International Consensus Statement. Int Angiol [Internet]. 2013 Apr;32(2):111–260. Available from: http://www.ncbi.nlm.nih.gov/pubmed/24402349

9. Escolar G, Garcia Frade J, Lopez Fernandez MF, Roldan V. Guía Sobre los Nuevos Anticoagulantes Orales: Sociedad Española de Hematología y Hemoterapia/ Sociedad Española de Trombosis y Hemostasia 2012 [Internet]. 2012. Available from: http://www.seth.es/images/files/guia-nuevos-anticoagulantes-orales.pdf

10. Wells PS, Forgie MA, Rodger MA. Treatment of Venous Thromboembolism. JAMA [Internet]. 2014 Feb 19;311(7):717. Available from: http://jama.jamanetwork.com/article.aspx?doi=10.1001/jama.2014.65

11. Lip GYH, Frison L, Halperin JL, Lane DA. Identifying Patients at High Risk for Stroke Despite Anticoagulation: A Comparison of Contemporary Stroke Risk Stratification Schemes in an Anticoagulated Atrial Fibrillation Cohort. Stroke [Internet]. 2010 Dec 1;41(12):2731–8. Available from: http://stroke.ahajournals.org/cgi/doi/10.1161/STROKEAHA.110.590257

12. Lip GYH, Nieuwlaat R, Pisters R, Lane DA, Crijns HJGM. Refining Clinical Risk Stratification for Predicting Stroke and Thromboembolism in Atrial Fibrillation Using a Novel Risk Factor-Based Approach. Chest [Internet]. 2010 Feb;137(2):263–72. Available from: http://linkinghub.elsevier.com/retrieve/pii/S0012369210600670

13. Piovella C, Dalla Valle F, Trujillo-Santos J, Pesavento R, López L, Font L, et al. Comparison of four scores to predict major bleeding in patients receiving anticoagulation for venous thromboembolism: findings from the RIETE registry. Intern Emerg Med [Internet]. 2014 Dec 17;9(8):847–52. Available from: http://link.springer.com/10.1007/s11739-014-1073-8

14. Heidbuchel H, Verhamme P, Alings M, Antz M, Hacke W, Oldgren J, et al. EHRA Practical Guide on the use of new oral anticoagulants in patients with non-valvular atrial fibrillation: executive summary. Eur Heart J [Internet]. 2013 Jul 1;34(27):2094–106. Available from: http://eurheartj.oxfordjournals.org/cgi/doi/10.1093/eurheartj/eht134

15. White RH. Identifying Risk Factors for Venous Thromboembolism. Circulation [Internet]. 2012 May 1;125(17):2051–3. Available from: http://circ.ahajournals.org/cgi/doi/10.1161/CIRCULATIONAHA.112.102814

16. van der Hulle T, Dronkers CEA, Huisman MV, Klok FA. Current standings in diagnostic management of acute venous thromboembolism: Still rough around the edges. Blood Rev [Internet]. 2016 Jan;30(1):21–6. Available from: http://linkinghub.elsevier.com/retrieve/pii/S0268960X15000570

17. Righini M, Le Gal G, Bounameaux H. Venous thromboembolism diagnosis: unresolved issues. Thromb Haemost [Internet]. 2014 Dec 11;113(6):1184–92. Available from: http://www.schattauer.de/index.php?id=1214&doi=10.1160/TH14-06-0530

18. Rosendaal F, Cannegieter S, van der Meer F, Briët E. A method to determine the optimal intensity of oral anticoagulant therapy. Thromb Haemost. 1993;69(3):236–9.

19. Mearns ES, Kohn CG, Song J-S, Hawthorne J, Meng J, White CM, et al. Meta-Analysis to Assess the Quality of International Normalized Ratio Control and Associated Outcomes in Venous Thromboembolism Patients. Thromb Res [Internet]. 2014 Aug;134(2):310–9. Available from: http://linkinghub.elsevier.com/retrieve/pii/S0049384814003016

20. Kooistra HAM, Gebel M, Sahin K, Lensing AWA, Meijer K. Independent predictors of poor vitamin K antagonist control in venous thromboembolism patients. Thromb Haemost [Internet]. 2015 Jul 30;114(6):1136–43. Available from: http://www.schattauer.de/index.php?id=1214&doi=10.1160/TH14-12-1033
